# Supplementary material
Source: PubMed Central journal article supplement (PMC390321)

Figure S1

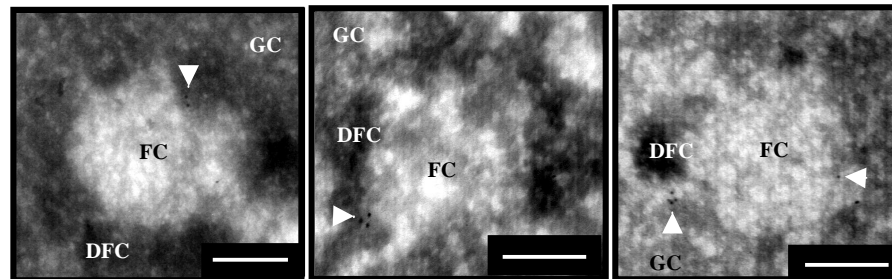

Table S1

|           | central FC | central DFC | GC | FC/DFC border | <i>TOTAL</i> |
|-----------|------------|-------------|----|---------------|--------------|
| sections  | 1          | 2           | 1  | 8             | 8            |
| units     | 1          | 5           | 3  | 28            | 30           |
| particles | 1          | 13          | 5  | 78            | 97           |

Supplement: nar_32_5_1654__2.pdf [file nar_32_5_1654__2.pdf]
